# Supplementary material
Source: publisher site journal article supplement (https://www.spandidos-publications.com/2733/downloadSupplementary)

Figure S1. High *SIRT6* expression is associated with poor prognosis in liver hepatocellular carcinoma and clear cell renal cell carcinoma. The Kaplan-Meier plotter database was used to assess the survival rates of patients with cancer, based on data from The Cancer Genome Atlas database. High *SIRT6* expression was associated with poor prognosis of patients with clear cell renal cell carcinoma and hepatocellular carcinoma. Conversely, high *SIRT6* expression was associated with favorable prognosis of patients with bladder carcinoma, cervical squamous cell carcinoma, head and neck squamous cell carcinoma, pancreatic adenocarcinoma, stomach adenocarcinoma and uterine corpus endometrial carcinoma. *SIRT6*, sirtuin 6; HR, hazard ratio.

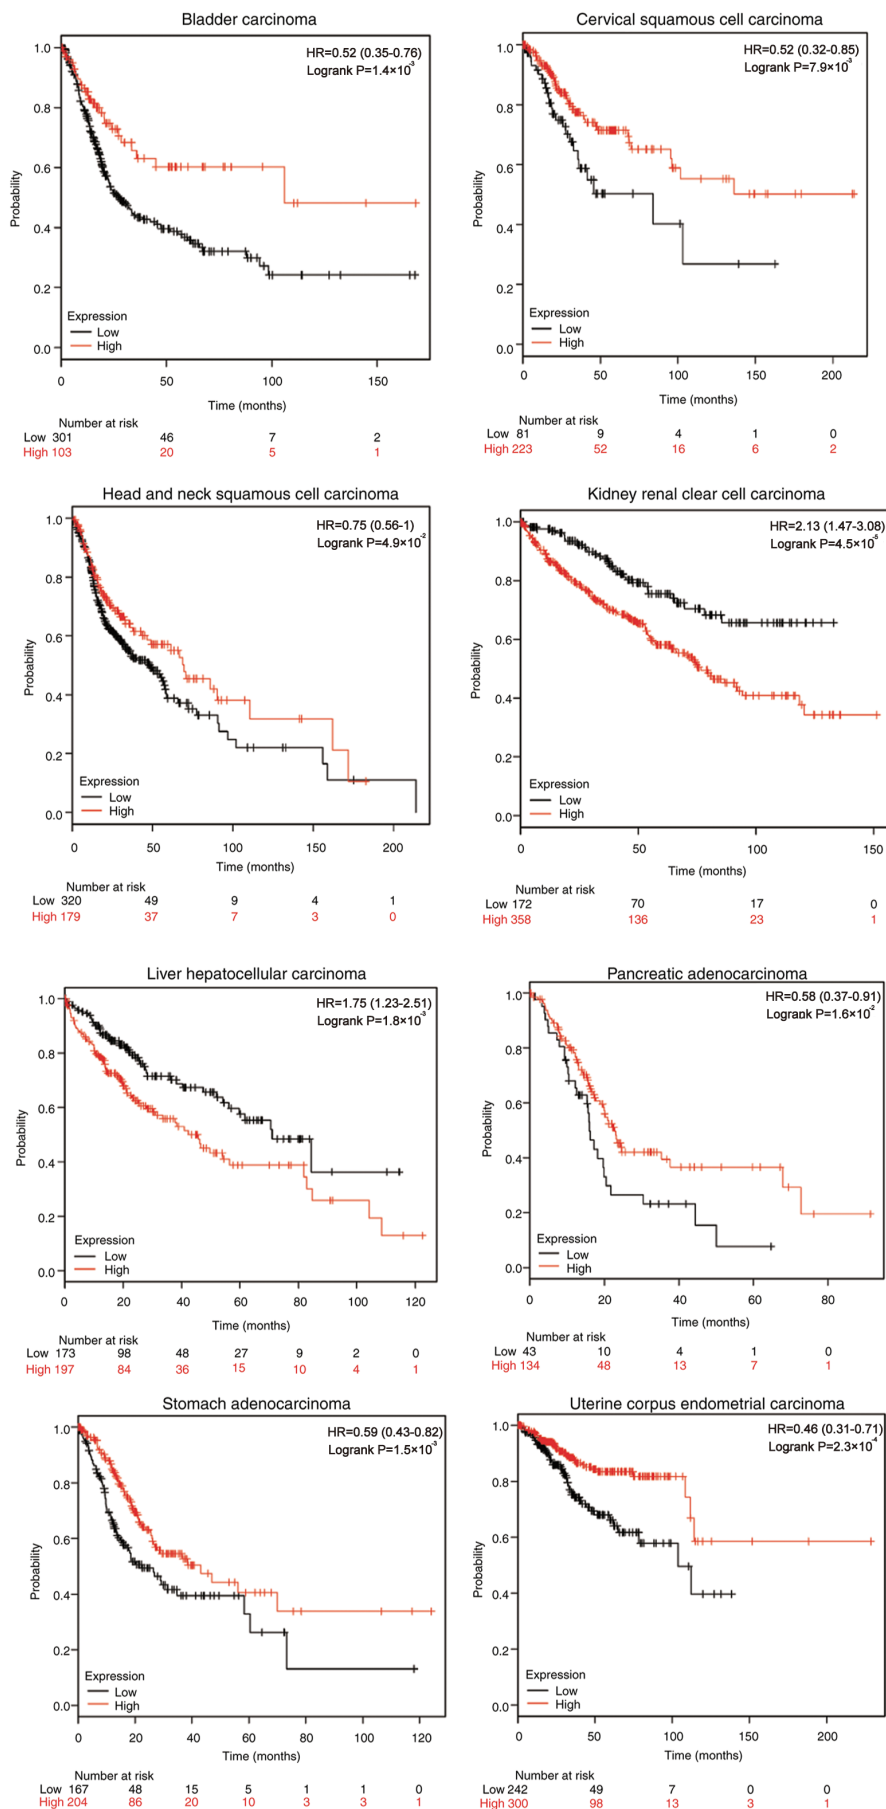

Supplement: Supplementary file 1 [file downloadSupplementary]
